# Supplementary material
Source: PubMed Central journal article supplement (PMC6881519)
Supplement: NIHMS1050524-supplement-SUPPLEMENTAL.pdf [file NIHMS1050524-supplement-SUPPLEMENTAL.pdf]

## A. BT-549/tet-CshRNA

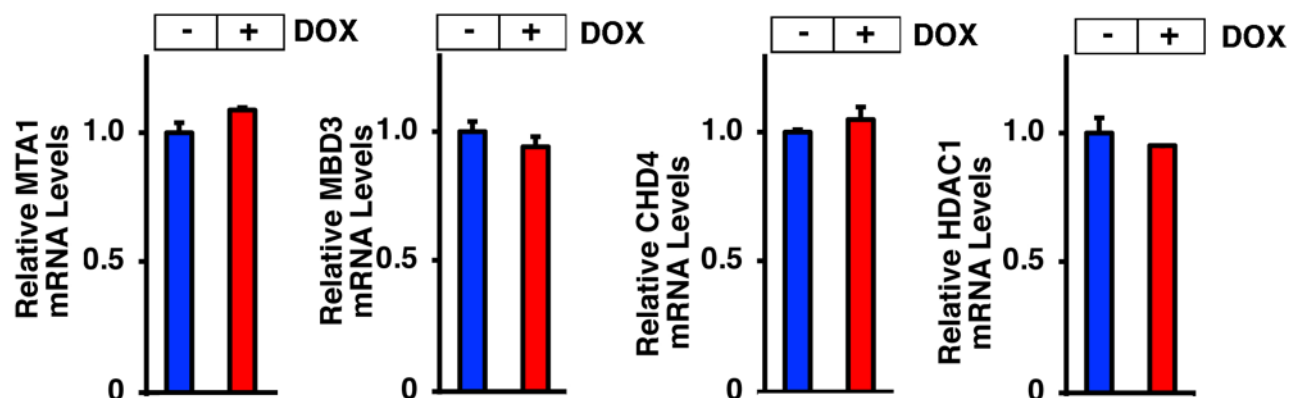

## B. SUM149/tet-CshRNA

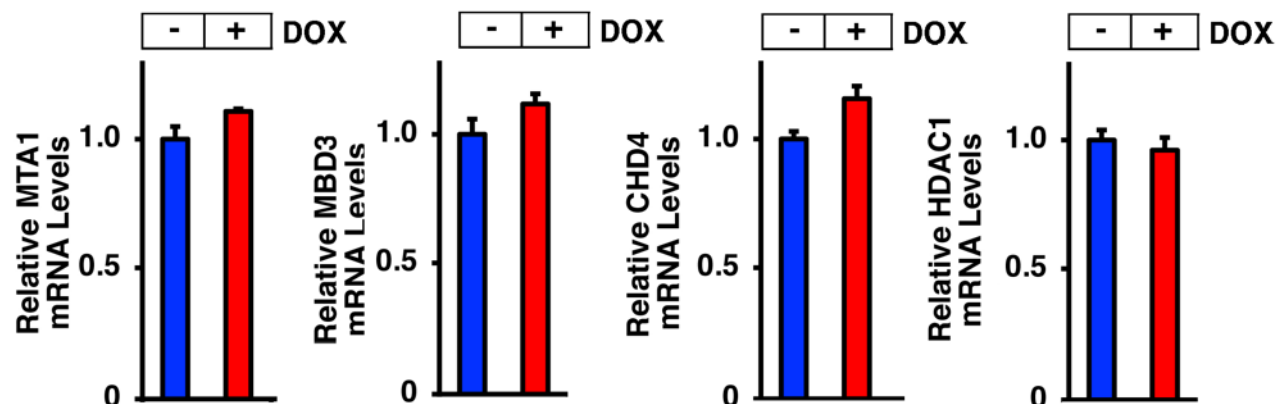

**Supplemental Figure S1. Treatment of BT-549/tet-CshRNA and SUM149/tet-CshRNA cells with DOX has no apparent effect on MTA1, MBD3, CHD4 or HDAC1 expression.** A-B. BT-549/tet-CshRNA (A) and SUM149/tet-CshRNA (B) cells were left untreated or treated with 500 ng/ml DOX for 7 days. Cells were analyzed for MUC1-C, MTA1, MBD3, CHD4 and HDAC1 mRNA levels using primers listed in Supplemental Table S2. The results (mean $\pm$ SD) are expressed as relative mRNA levels compared to that obtained for untreated cells (assigned a value of 1).

**A. BT-549**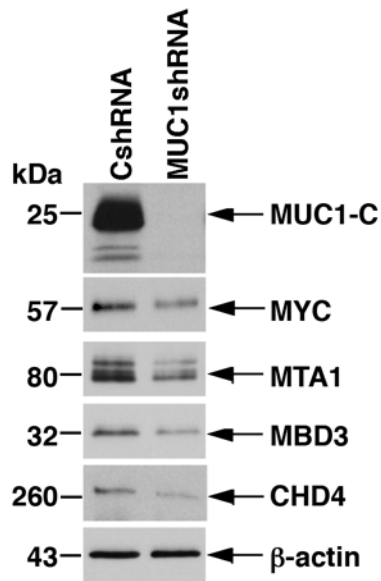**B. SUM149**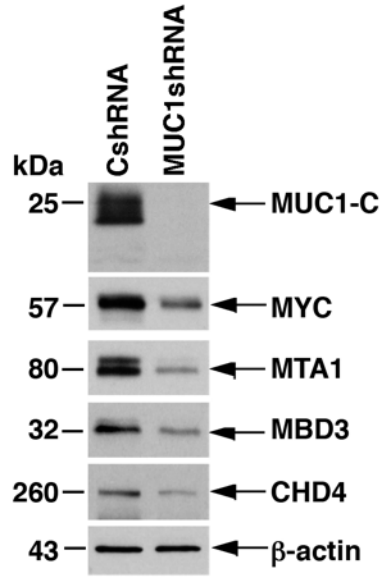**C. SUM149**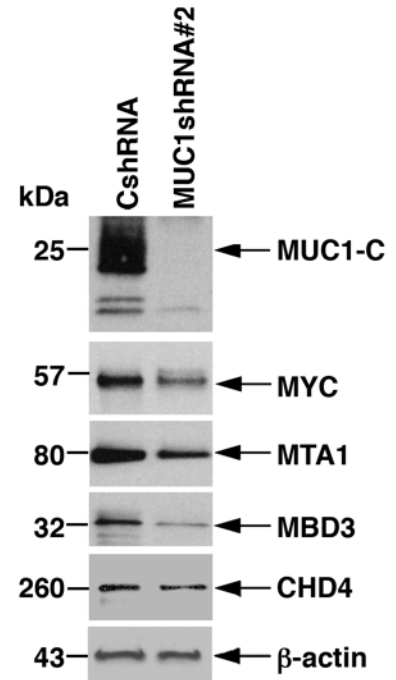

**Supplemental Figure S2. Targeting MUC1-C with a different shRNA is associated with downregulation of MTA1, MBD3 and CHD4 expression.** A-B. Lysates from BT-549 (A) and SUM149 (B) cells stably expressing a CshRNA or MUC1shRNA were immunoblotted with antibodies against the indicated proteins. C. Lysates from SUM149 cells stably expressing a CshRNA or a different MUC1shRNA#2 were immunoblotted with antibodies against the indicated proteins.

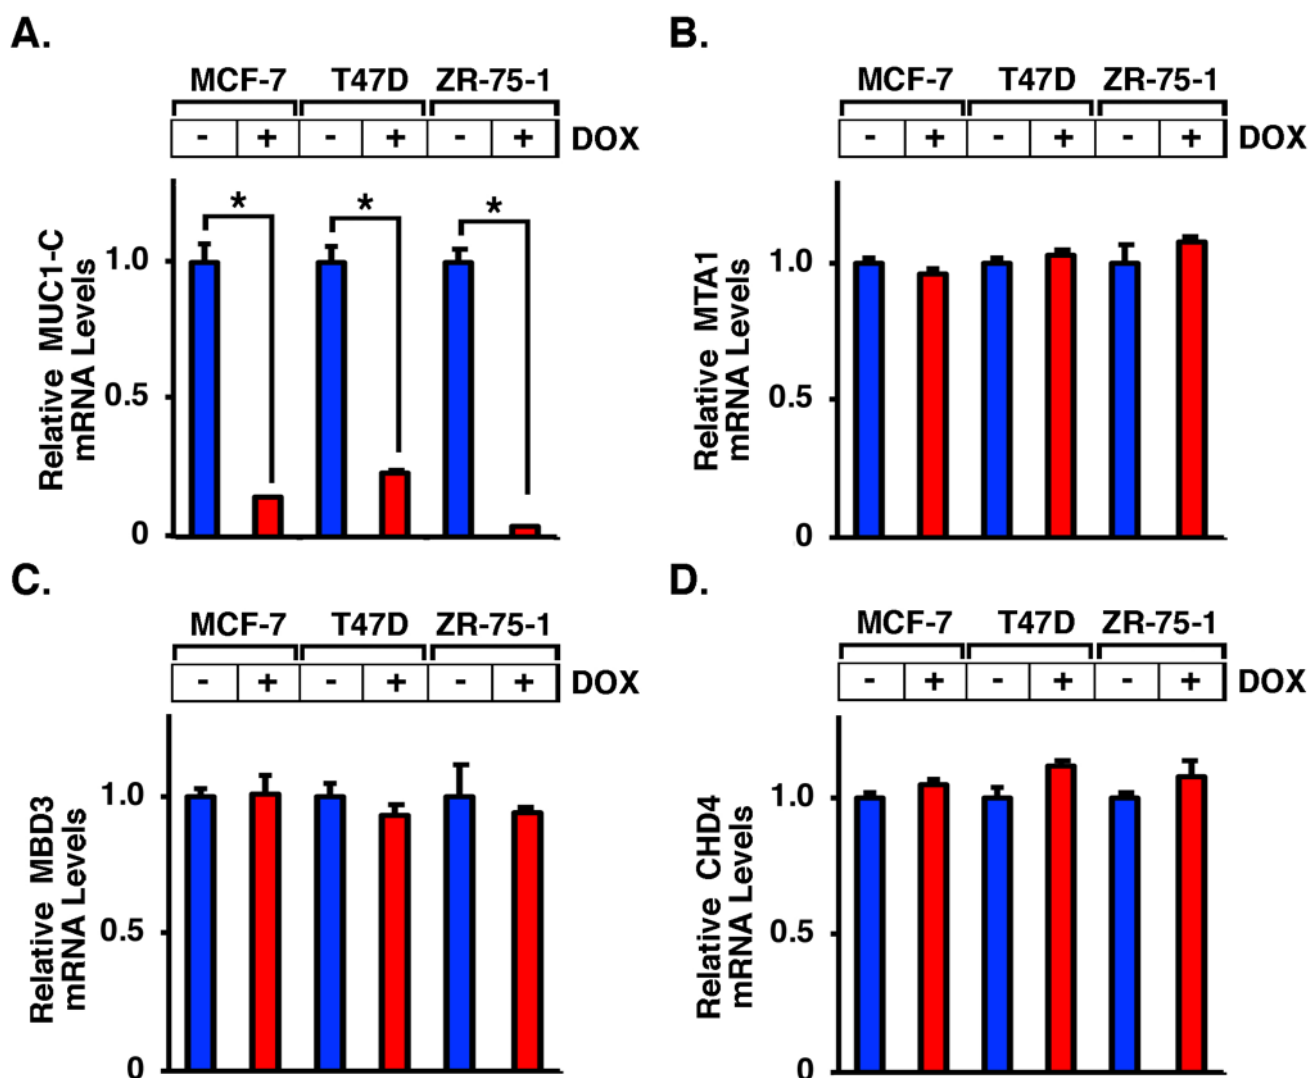

**Supplemental Figure S3. Targeting MUC1-C in luminal MCF-7, T47D and ZR-75-1 BC cells has no detectable effect on MTA1, MBD3 or CHD4 expression.** A-D. MCF-7/tet-MUC1shRNA, T47D/tet-MUC1shRNA and ZR-75-1/tet-MUC1shRNA cells left untreated or treated with 500 ng/ml DOX for 7 days were analyzed for MUC1-C (A), MTA1 (B), MBD3 (C) and CHD4 (D) mRNA levels. The results (mean $\pm$ SD) are expressed as relative mRNA levels compared to that obtained for untreated cells (assigned a value of 1).

**A. BT-549/  
tet-MYCshRNA#2**

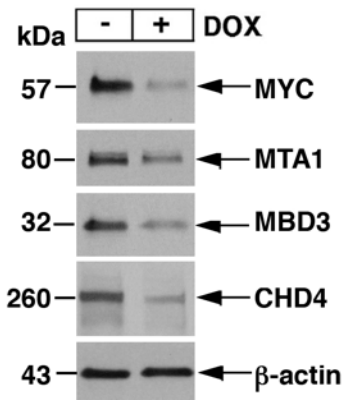

**B. BT-549**

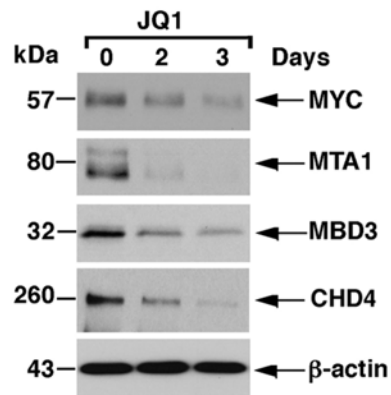

**C. SUM149**

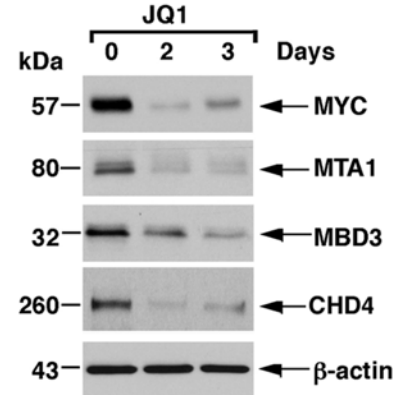

**Supplemental Figure S4. Targeting MYC with a different shRNA or treatment with the JQ1 inhibitor is associated with downregulation of MTA1, MBD3 and CHD4 expression.** A. Lysates from BT-549 cells stably expressing a different tet-MYCshRNA#2 left untreated or treated with 500 ng/ml DOX for 7 days were immunoblotted with antibodies against the indicated proteins. B-C. BT-549 (B) and SUM149 (C) cells were treated with 5  $\mu$ M JQ1 for the indicated days. Lysates were immunoblotted with antibodies against the indicated proteins.

## A. BT-549

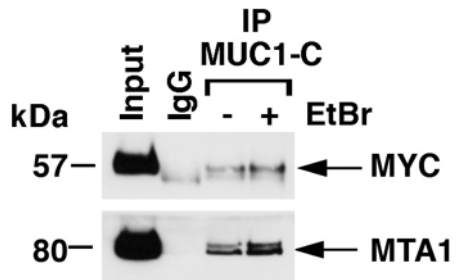

## B. SUM149

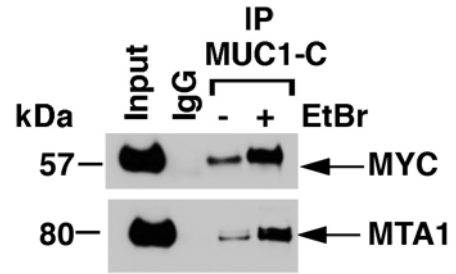

**Supplemental Figure S5. Association of MUC1-C with MYC and MTA1 in the presence of ethidium bromide to inhibit non-specific association of proteins and nucleic acids.** A-B. Nuclear lysates from BT-549 (A) and SUM149 (B) cells were incubated with anti-MUC1-C or a control IgG in the absence and presence of ethidium bromide (EtBr). The input and precipitates were analyzed by immunoblotting with anti-MYC and anti-MTA1.

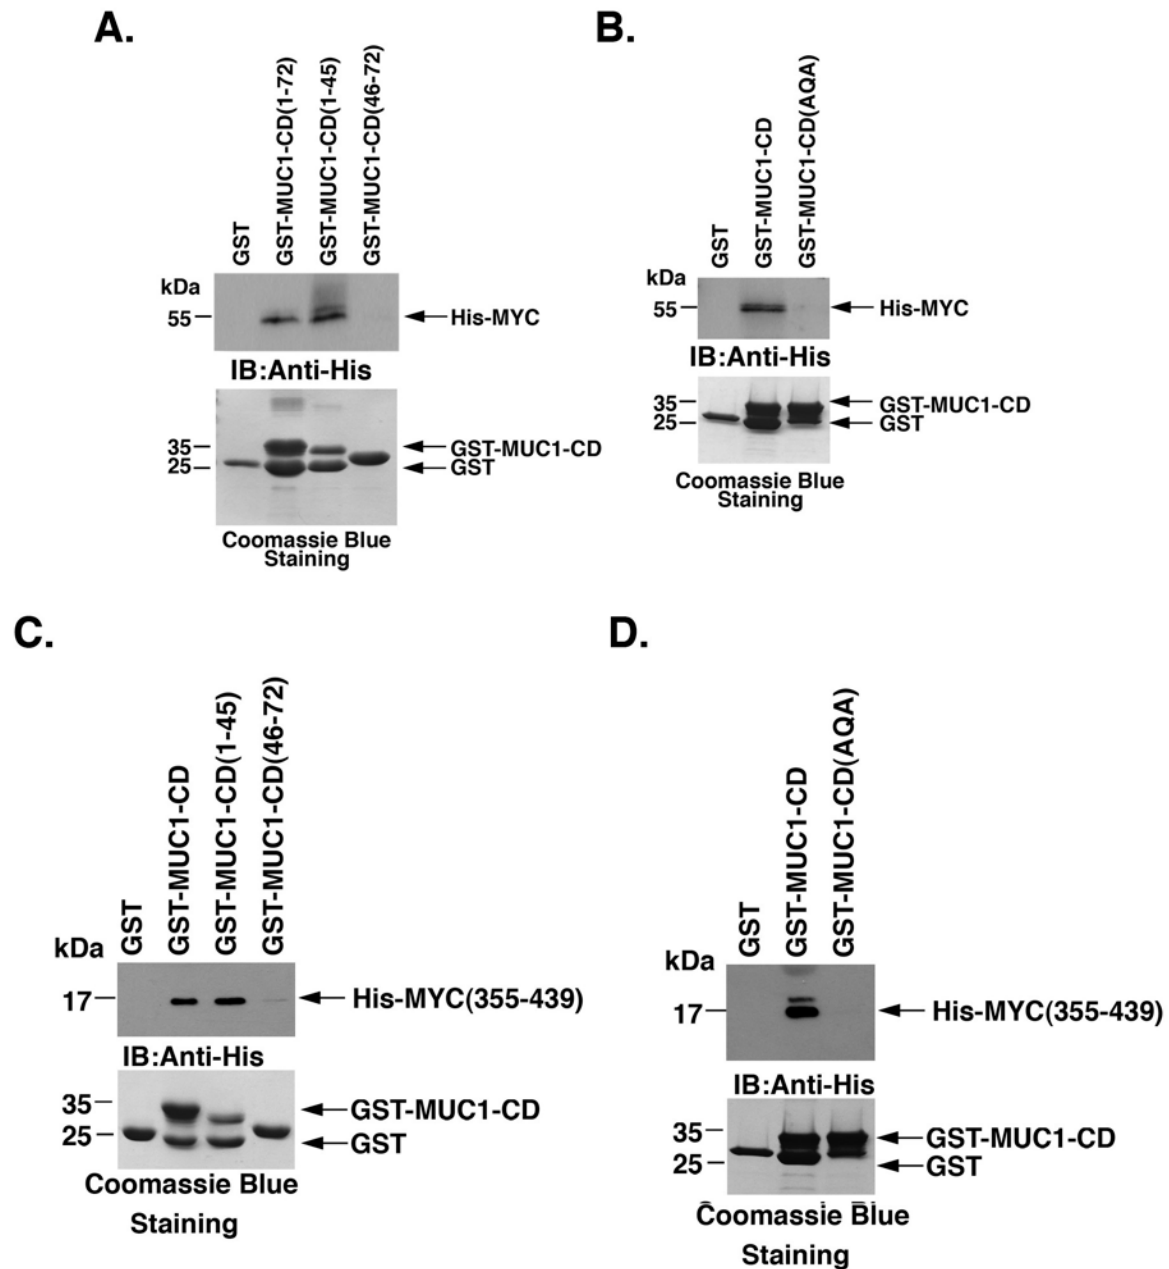

**Supplemental Figure S6. MUC1-C CQC motif binds directly to the MYC HLH-LZ domain.** A-B. GST and the indicated GST-MUC1-CD fusion proteins were incubated with His-MYC. The adsorbates were immunoblotted with anti-His. Input of the GST proteins was assessed by Coomassie Blue staining. C-D. GST, GST-MUC1-CD (full length; 1-72), GST-MUC1-CD(1-45), GST-MUC1-CD(46-72) and GST-MUC1-CD(AQA) were incubated with His-tagged MYC(355-439). The adsorbates were immunoblotted with anti-His. Input of the GST proteins was assessed by Coomassie Blue staining.

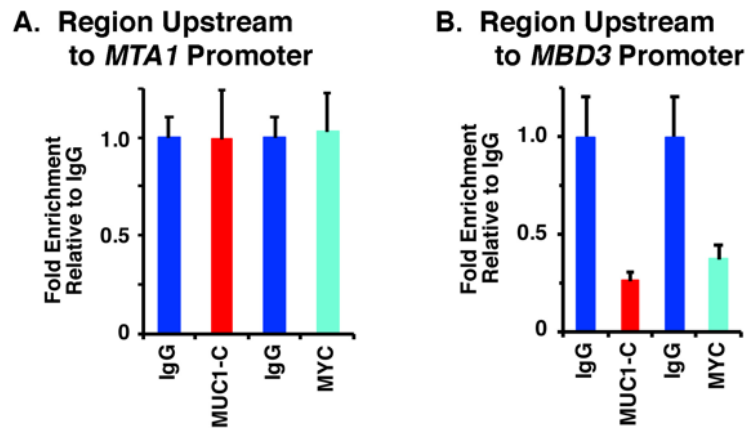

**Supplemental Figure S7. ChIP studies performed on regions upstream to the *MTA1* and *MBD3* promoters.** A-B. Chromatin from BT-549 cells was precipitated with anti-MUC1-C, anti-MYC or a control IgG. The DNA samples were amplified by qPCR with primers for regions ~5-kb upstream to the *MTA1* (A) and *MBD3* (B) promoters (Supplemental Table S2).

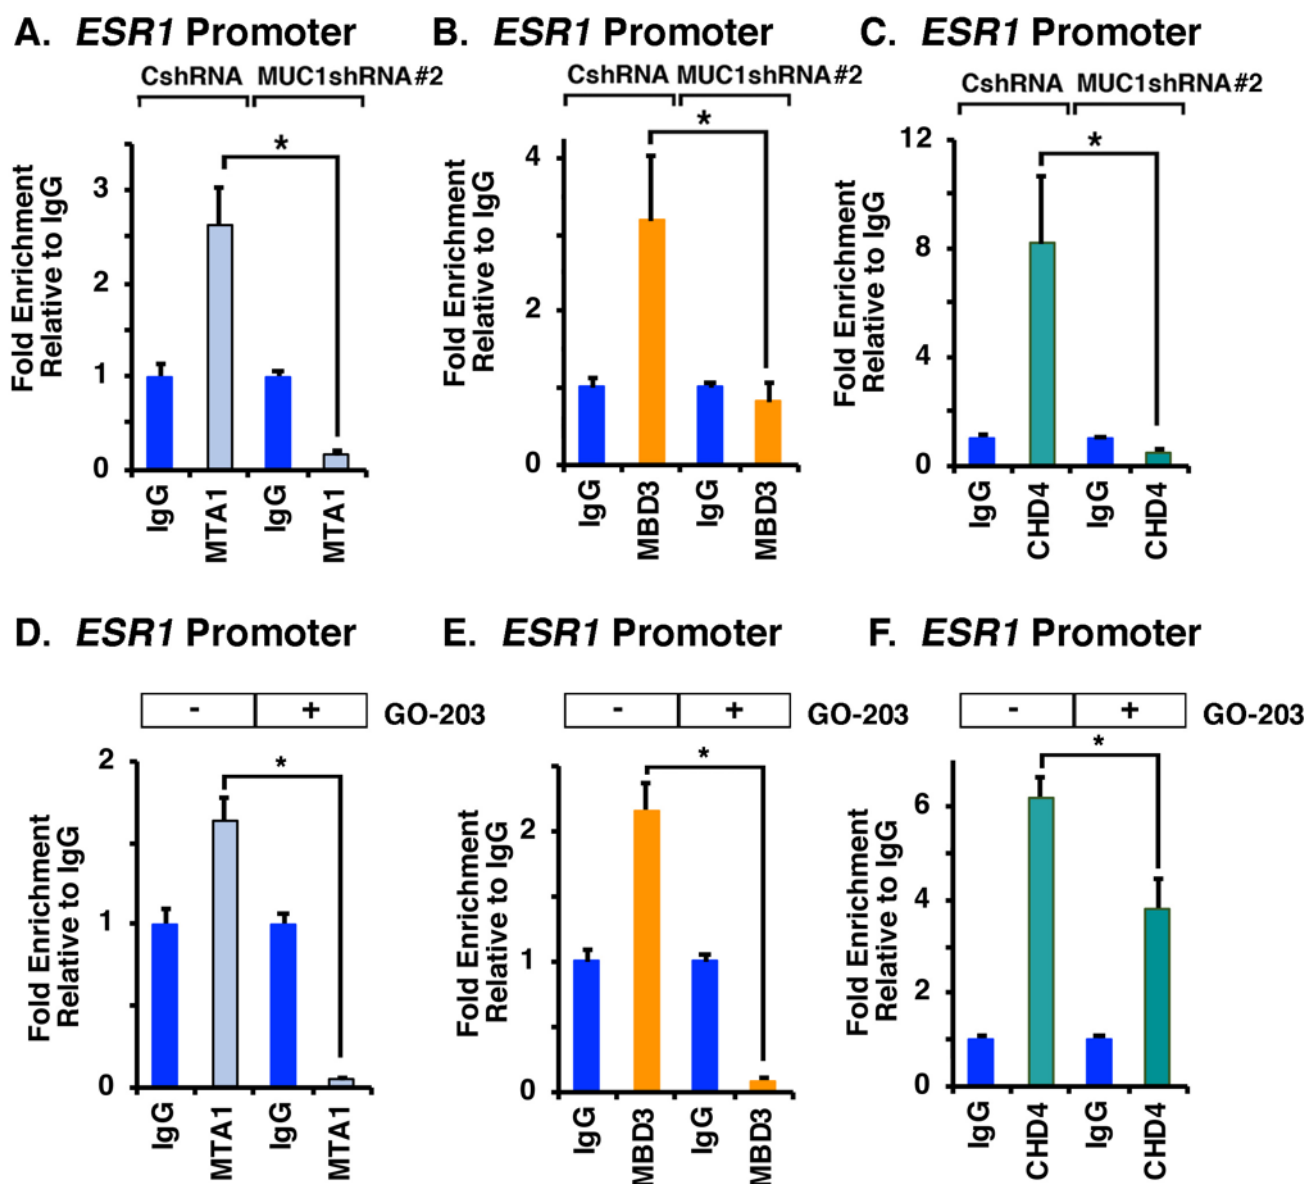

**Supplemental Figure S8. ChIP studies performed on the *ESR1* promoter.** A-C. Chromatin from BT-549/CshRNA and BT-549/MUC1shRNA#2 cells was precipitated with anti-MTA1 (A), anti-MBD3 (B), anti-CHD4 (C) or a control IgG. D-F. Chromatin from BT-549 cells treated with 5  $\mu$ M GO-203 for 48 h was precipitated with anti-MTA1 (D), anti-MBD3 (E), anti-CHD4 (F) or a control IgG. The DNA samples were amplified by qPCR with primers for the *ESR1* promoter. The results (mean $\pm$ SD of three determinations) are expressed as the relative fold enrichment compared to that obtained with the IgG control (assigned a value of 1).

## BT-549

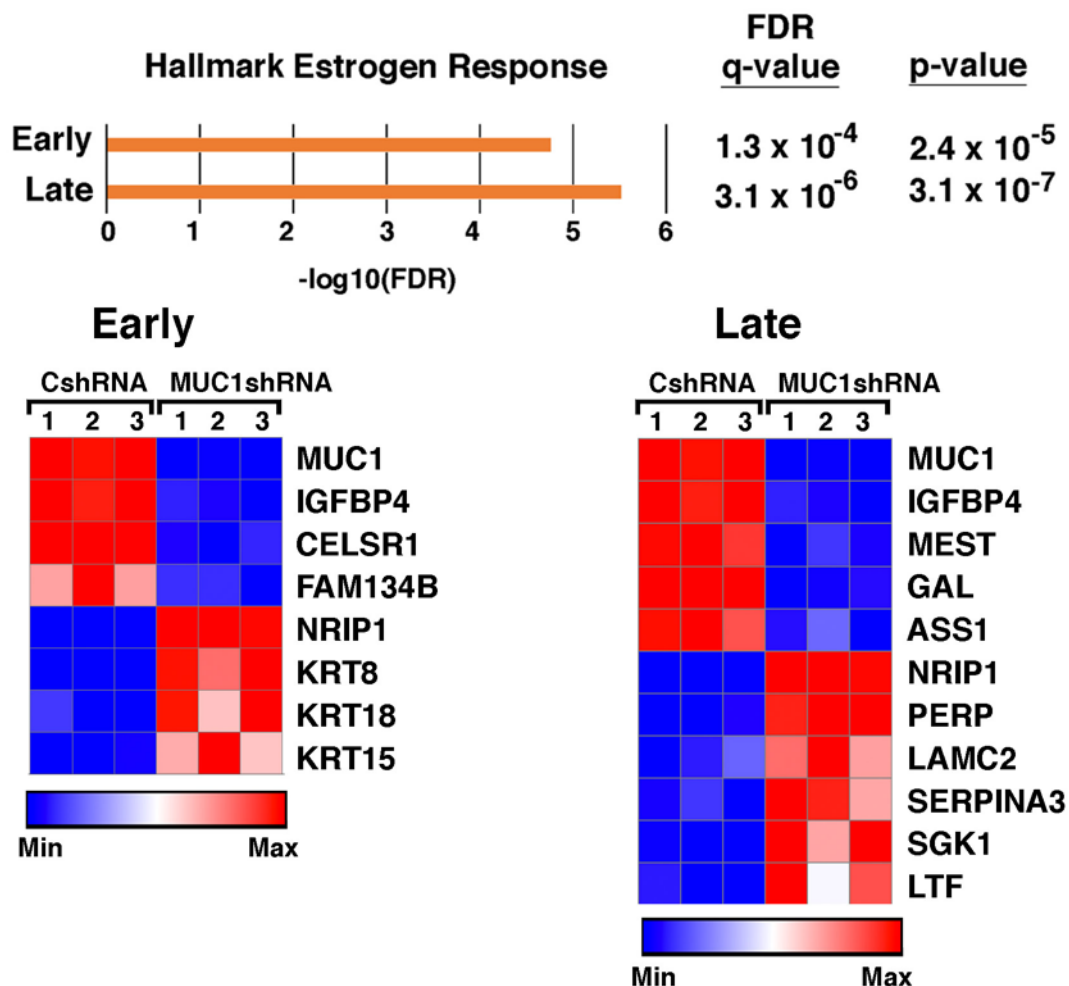

**Supplemental Figure S9. MUC1-C regulates the Hallmark Estrogen Response Early and Late gene sets in BT-549 cells.** A and B. RNA-seq was performed in triplicate on BT-549/CshRNA and BT-549/MUC1shRNA cells. The data sets were analyzed using Hallmark for enrichment of the Estrogen Response Early (A) and Estrogen Response Late (B) gene sets.

SUM149

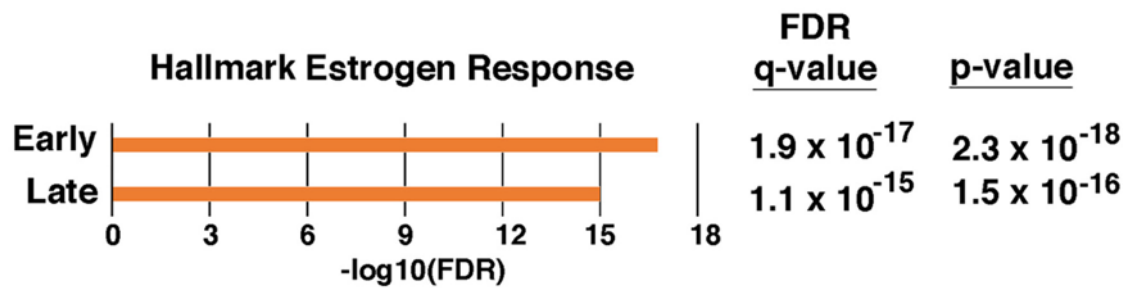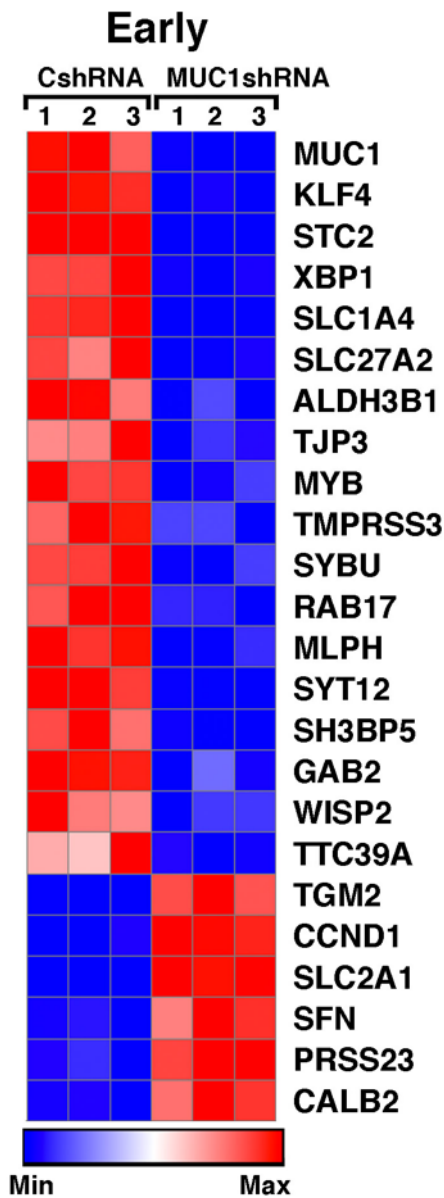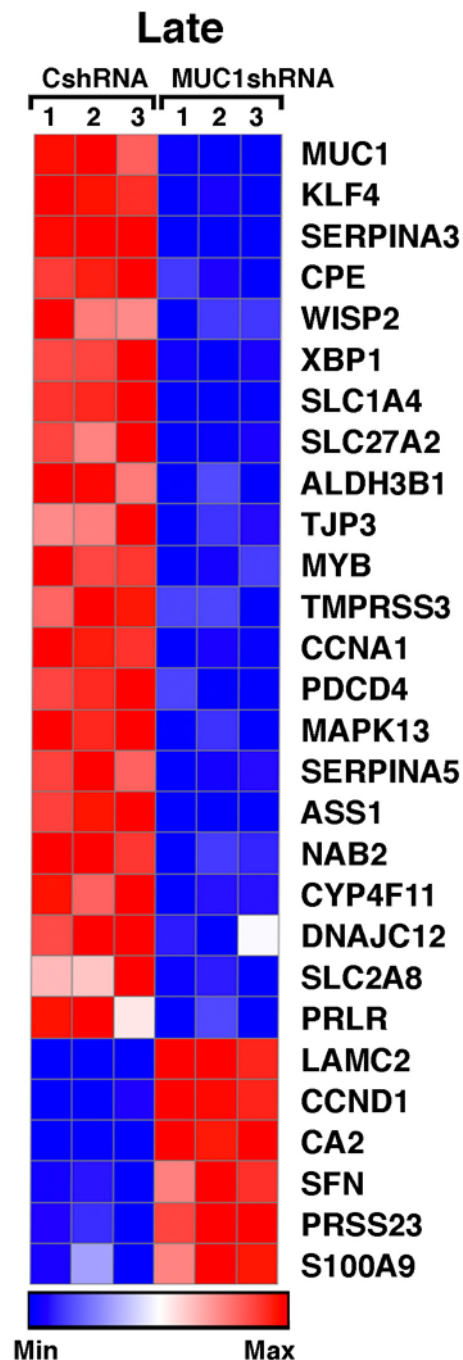

**Supplemental Figure S10. MUC1-C regulates the Hallmark Estrogen Response Early and Late gene sets in SUM149 cells.** A and B. RNA-seq was performed in triplicate on SUM149/CshRNA and SUM149/MUC1shRNA cells. The data sets were analyzed using Hallmark for enrichment of the Estrogen Response Early (A) and Estrogen Response Late (B) gene sets.

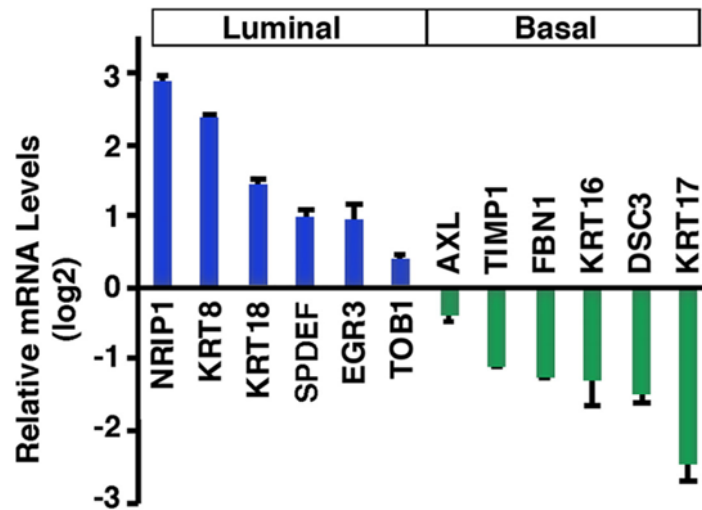

**Supplemental Figure S11. Silencing MUC1-C regulates the expression of luminal and basal markers.** BT-549 cells expressing a CshRNA or MUC1shRNA were analyzed for mRNA levels of the indicated genes. The results (mean $\pm$ SD) are expressed as relative mRNA levels compared to that obtained for CshRNA expressing cells (assigned a value of 1) and plotted on a log2 scale.

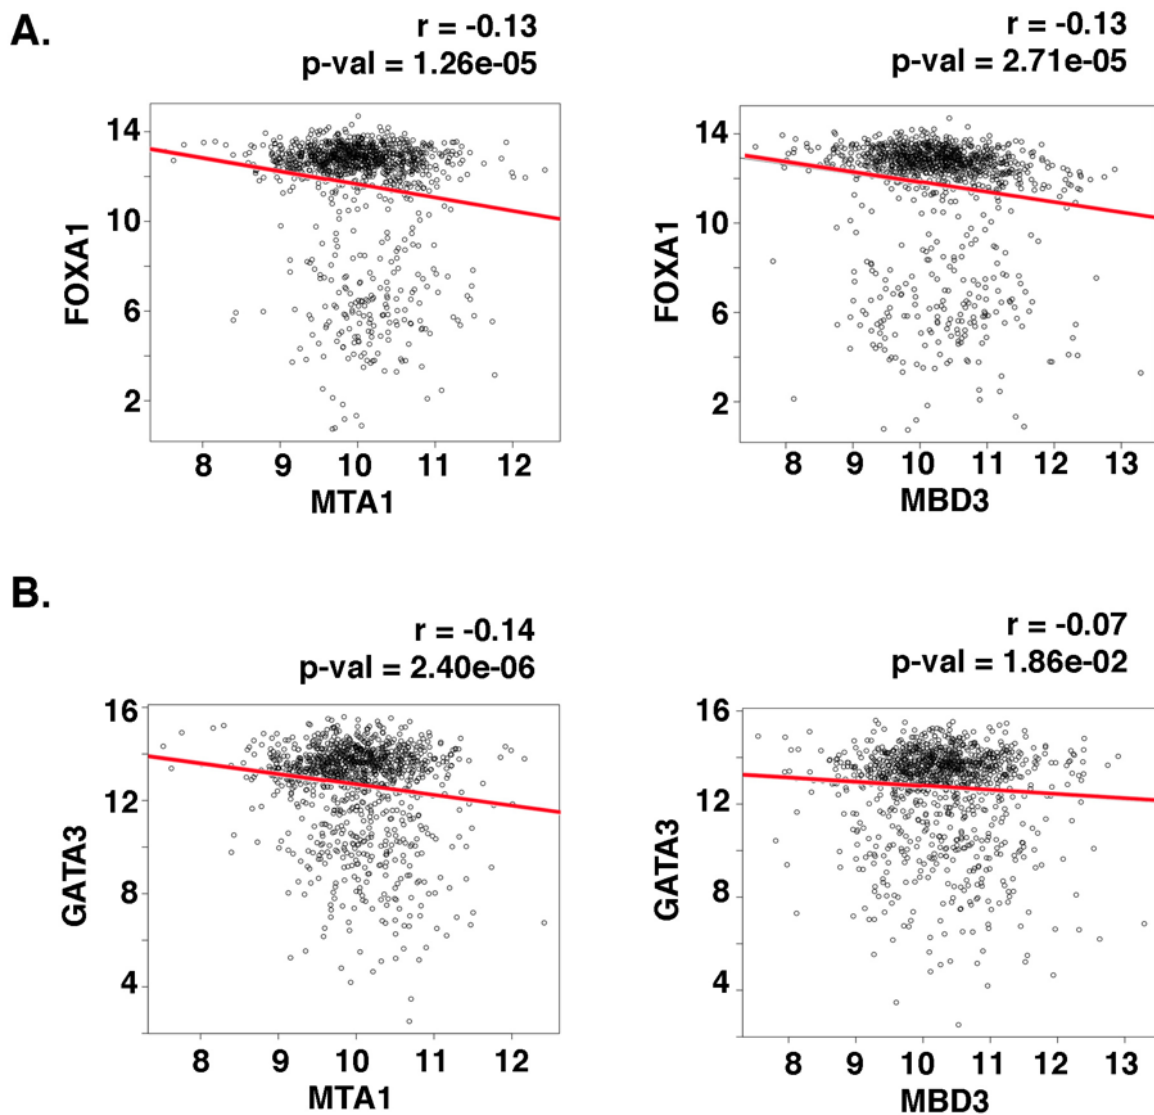

**Supplemental Figure S12. Expression of MTA1 and MBD3 correlates negatively with that of FOXA1 and GATA3 in breast cancers. A-B.** Normalized, log2 transformed expression data were obtained for the TCGA-BRCA cohort and correlations were determined. Pearson correlation coefficient and significance are shown.

**Supplemental Table S1. Primers used for qRT-PCR analysis.**

| <b>Primer</b> | <b>Forward</b>           | <b>Reverse</b>                |
|---------------|--------------------------|-------------------------------|
| GAPDH         | CCATGGAGAAGGCTGGGG       | CAAAGTTGTCATGGATGACC          |
| MUC1          | TACCGATCGTAGCCCCCTATG    | CTCACCAGCCCAAACAGG            |
| MTA1          | GACCAGGCAGGCTTTCTATC     | CTGTTGATGGGCAGGTAGG           |
| MBD3          | CCGCTCTCCTTCAGTAAATGTAAC | GGCTGGAGTTTGGTTTTTCAGAA       |
| CHD4          | CACTTTTGAACAACAGCCTGC    | TCCCGAGGTTTCTTAGGCTT          |
| HDAC1         | CTACTACGACGGGGATGTTGG    | GAGTCATGCGGATTTCGGTGAG        |
| MYC           | TTCGGGTAGTGGAACACCAG     | AGTAGAAATACGGCTGCACC          |
| ESR1          | GACAGGGAGCTGGTTCACAT     | AGGATCTCTAGCCAGGCACA          |
| FOXA1         | CCCCTTTGTCTCTCTACCC      | CTGCAAAGCAAGAAGCAGAGT         |
| GATA3         | AGCCAGGAGAGCAGGGACG      | CTGTTAATATTGTGAAGCTTGTAGTAGAG |
| NR1P1         | AGAGCAGAGACCCAGCAAAC     | CAGGAGCAACTGGAGGACAG          |
| KRT8          | CGAGGATATTGCCAACCGCAG    | CCTCAATCTCAGCCTGGAGCC         |
| KRT18         | GTTGACCGTGAGGTAGATGC     | GAGCCAGCTCGTCATATTGGG         |
| EGR3          | GACATCGGTCTGACCAACGAG    | GGCGAACTTTCCCAAGTAGGT         |
| SPDEF         | AGCCTACAGAAGGGCAGTGA     | AACTCAGGGGTGCAGATGTC          |
| TOB1          | TCACTCTGCTGCTGTAAGCC     | GGGAGAAGTACGTGCAACCT          |
| AXL           | GTGGGCAACCCAGGGAATATC    | GTACTGTCCCGTGTGCGAAAG         |
| TIMP1         | AGACCTACACTGTTGGCTGTGAG  | GACTGGAAGCCCTTTTCAGAG         |
| FBN1          | ATCGGGAAGGGTACTGCTTC     | GTCACAGCAGCATTCCGATT          |
| KRT16         | GACCGGCGGAGATGTGAAC      | CTGCTCGTACTGGTCACGC           |
| DSC3          | GACCCTCGTGATCTTCAGTC     | ACCTGAAGCACTCTTCCAAA          |
| KRT17         | GGAGATTGCCACCTACCG       | TGCCATCCTGGACCTCTT            |

**Supplemental Table S2. Primers used for ChIP-PCR analysis.**

| <b>Gene</b>             | <b>Forward</b>         | <b>Reverse</b>           |
|-------------------------|------------------------|--------------------------|
| MTA1<br>Promoter        | GAGGGATCACCAGGGAAATG   | GGCCCTTCCACCAGAAC        |
| MTA1<br>Upstream Region | GCATTCCTTGGCTGGTAGTT   | TAGCCACAAGTGTGTTTCAGG    |
| MBD3<br>Promoter        | CATGGTGAAATCCCGTCTCTAC | CTCCCGGGTTCAAGTTGTTAT    |
| MBD3<br>Upstream Region | CTCAGGATGGACAAGAGGAAAC | GCAGGTTTCAGTGAGGTTTAATG  |
| ESR1<br>Promoter        | CTAGTCAAATGGTGGTGCTAGT | ATCCGTTCTGAGTCGGTAGA     |
| GAPDH<br>Promoter       | TACTAGCGGTTTTACGGGCG   | TCGAACAGGAGGAGCAGAGAGCGA |
